# Supplementary material for: Comparison of the Effect of the Amino Acids on Spontaneous Formation and Transformation of Calcium Phosphates
Source: MDPI journal article supplement (doi:10.3390/cryst11070792), 2021-07-07
Supplement: s1 [file s1]

# Comparison of the Effect of the Amino Acids on Spontaneous Formation and Transformation of Calcium Phosphates

Ina Erceg <sup>1</sup>, Nadica Maltar-Strmečki <sup>2</sup>, Darija Domazet Jurašin <sup>1</sup>, Vida Strasser <sup>1</sup>, Marija Ćurlin <sup>3</sup>, Daniel Mark Lyons <sup>4</sup>, Borna Radatović <sup>5</sup>, Nives Matijaković Mlinarić <sup>6</sup>, Damir Kralj <sup>6</sup> and Maja Dutour Sikirić <sup>1,\*</sup>

<sup>1</sup> Laboratory for Biocolloids and Surface Chemistry, Division of Physical Chemistry, Ruđer Bošković Institute, Bijenička cesta 54, 10000 Zagreb, Croatia; ierceg@irb.hr (I.E.); djurasin@irb.hr (D.D.J.); Vida.Strasser@irb.hr (V.S.)

<sup>2</sup> Laboratory for Magnetic Resonances, Division of Physical Chemistry, Ruđer Bošković Institute, Bijenička cesta 54, 10000 Zagreb, Croatia; nstrm@irb.hr

<sup>3</sup> Department of Histology and Embryology, School of Medicine, University of Zagreb, Šalata 3, 10 000 Zagreb, Croatia; marija.curlin@mef.hr

<sup>4</sup> Center for Marine Research, Ruđer Bošković Institute, Giordano Paliaga 5, 52210 Rovinj, Croatia; lyons@irb.hr

<sup>5</sup> Institute for Physics, Bijenička cesta 46, 10000 Zagreb, Croatia; bradatovic@ifs.hr

<sup>6</sup> Laboratory for Precipitation Processes, Division of Materials Chemistry, Ruđer Bošković Institute, Bijenička cesta 54, 10000 Zagreb, Croatia; Nives.Matijakovic@irb.hr (N.M.M.), Damir.Kralj@irb.hr (D.K.)

\* Correspondence: sikiric@irb.hr; Tel: +385 1 456 0941

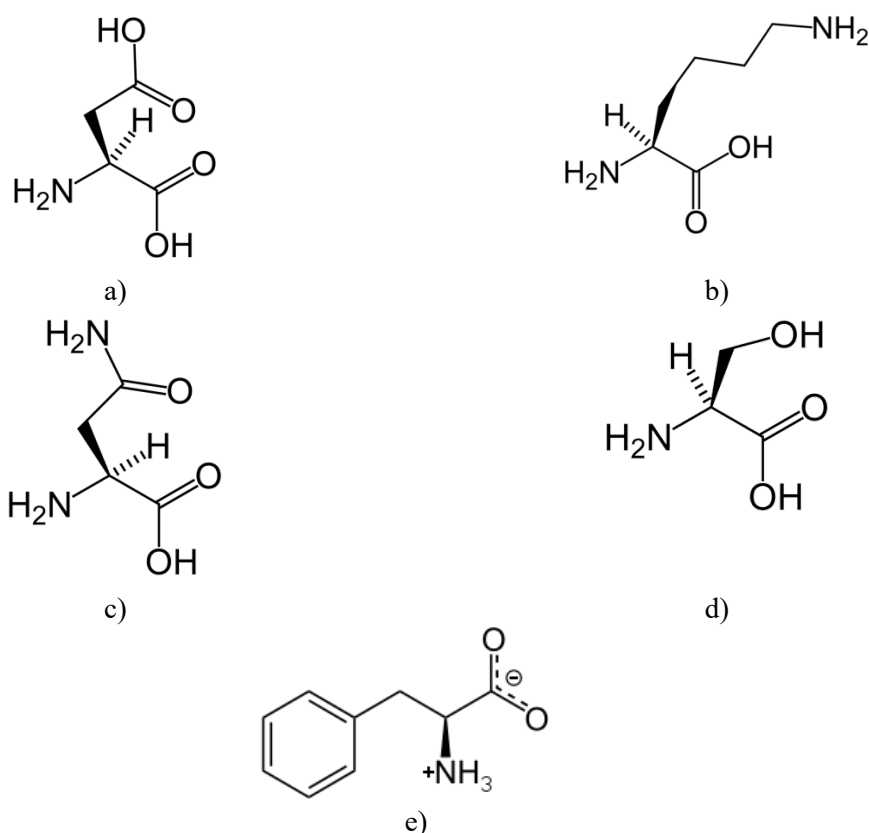

**Figure S11.** Molecular structure of investigated amino acids: a) Asp, b) Lys, c) Asn, d) Ser and e) Phe.

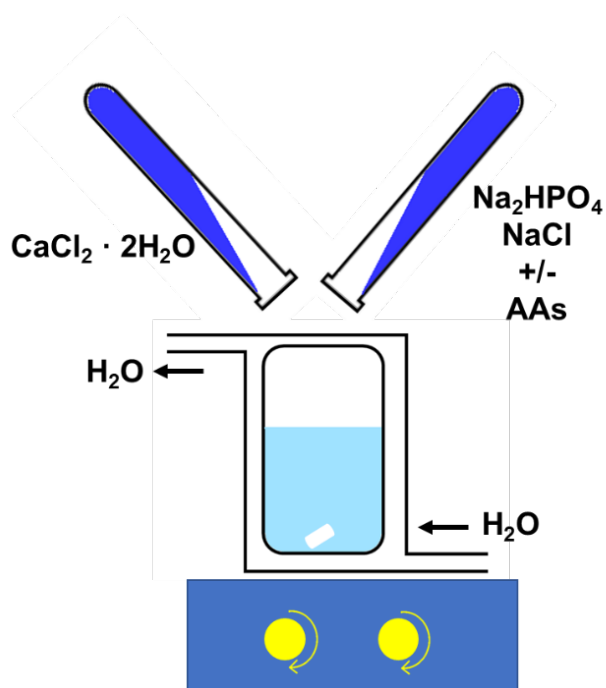

**Figure SI2.** Schematic illustration of precipitation experiments.

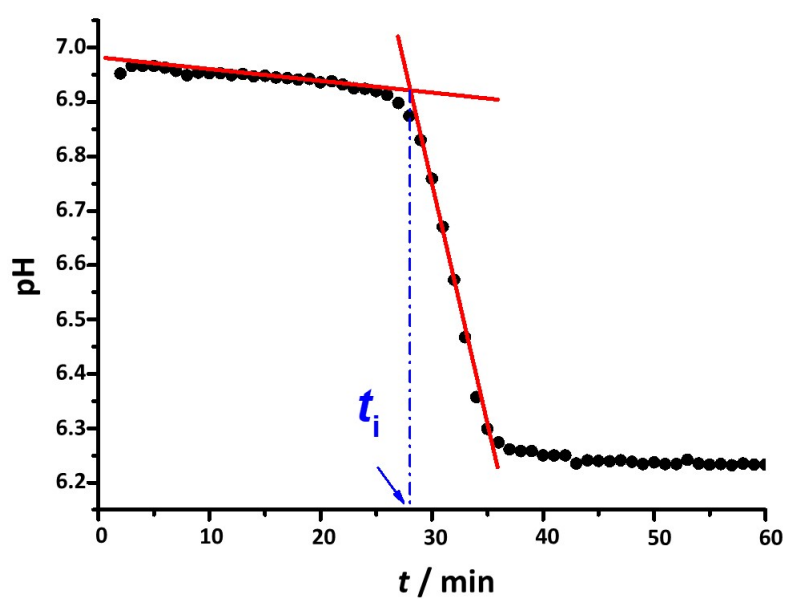

**Figure SI3.** Determination of induction time ( $t_i$ ) as the intercept between two tangents drawn on the first two parts of the pH vs time curve.

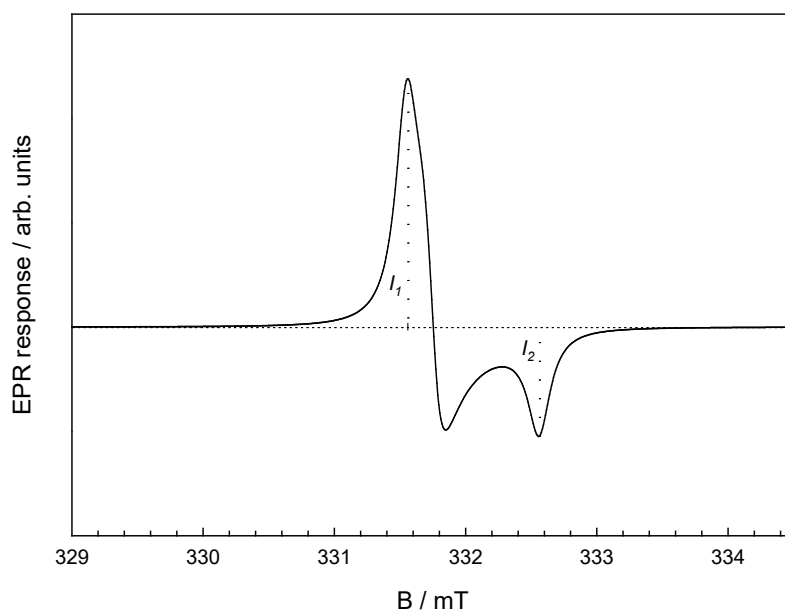

**Figure SI4.** Definition of  $R$ -value:  $R=I_2/I_1$ .

**Table SI1.** Experimental conditions for precipitation experiments.

|                                              |                                               |
|----------------------------------------------|-----------------------------------------------|
| $c(\text{CaCl}_2 \cdot 2\text{H}_2\text{O})$ | $5 \text{ mmol dm}^{-3}$                      |
| $c(\text{Na}_2\text{HPO}_4)$                 | $5 \text{ mmol dm}^{-3}$                      |
| $c(\text{NaCl})$                             | $0.15 \text{ mol dm}^{-3}$                    |
| $c(\text{amino acid})$                       | $1, 2.5, \text{ and } 5 \text{ mmol dm}^{-3}$ |
| pH                                           | 7.4                                           |
| $V$                                          | 40 mL                                         |
| $\vartheta$                                  | $(25 \pm 0.1) ^\circ\text{C}$                 |
| Mixing mode                                  | magnetic stirring                             |
